# Supplementary material for: Clonality and Evolutionary History of Rhabdomyosarcoma
Source: PubMed Central journal article supplement (PMC4358975; doi:10.1371/journal.pgen.1005075), 2015-03-13

# Somatic VAF distribution for Fusion Negative RMS: before and after NCR (normal contamination correction)

Each row has two subrows: the upper one is before NCR the lower one is after NCR

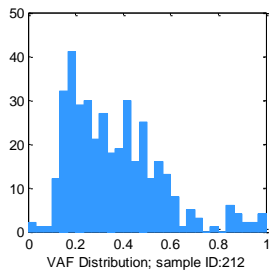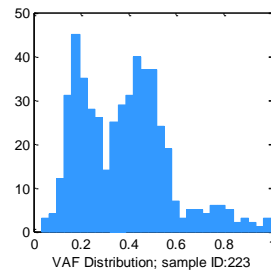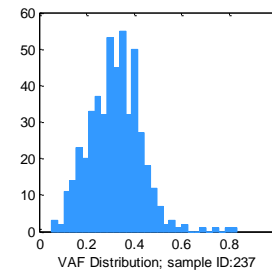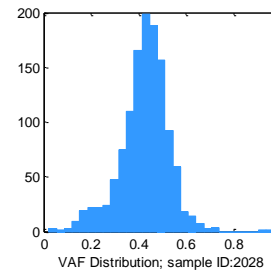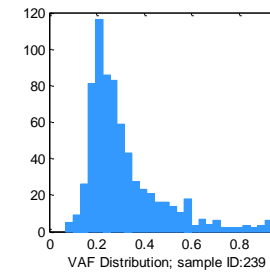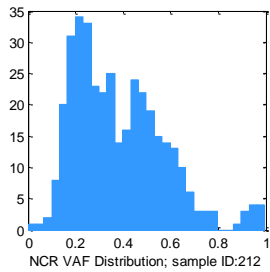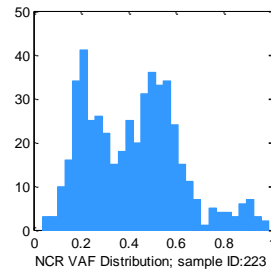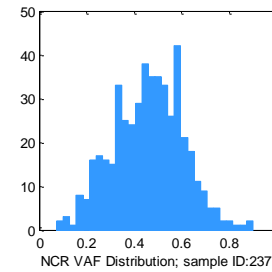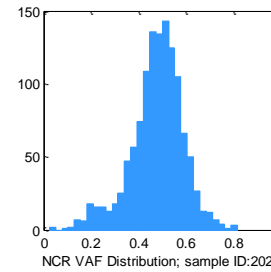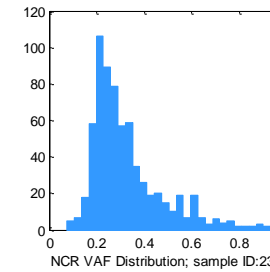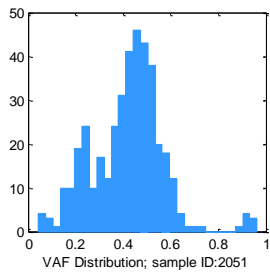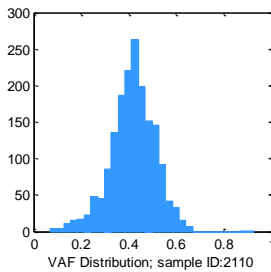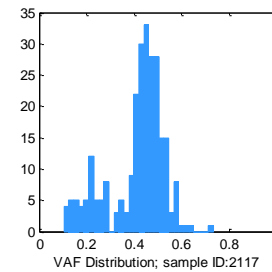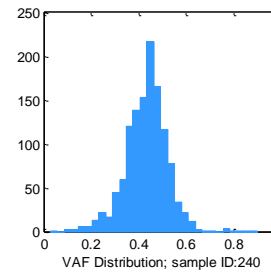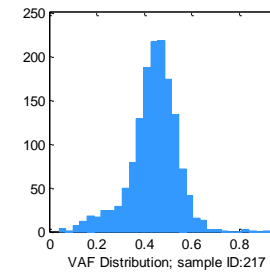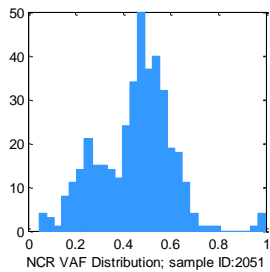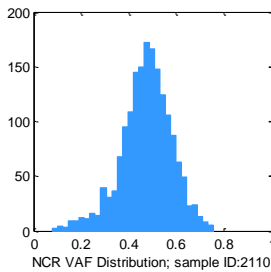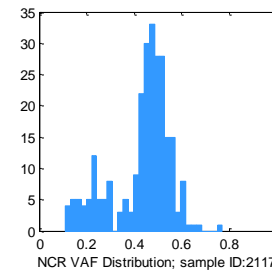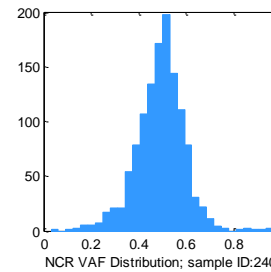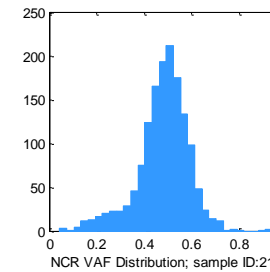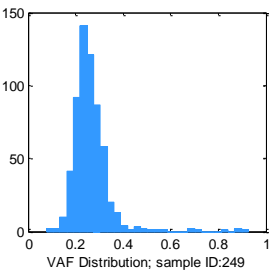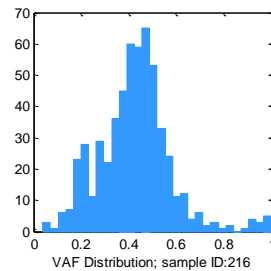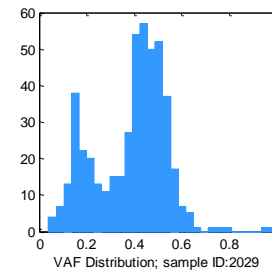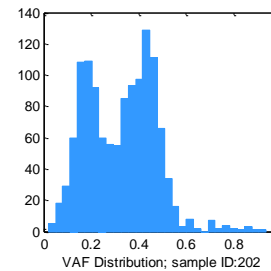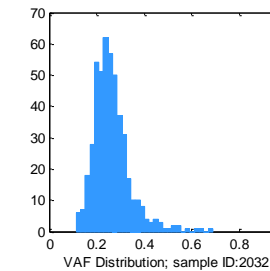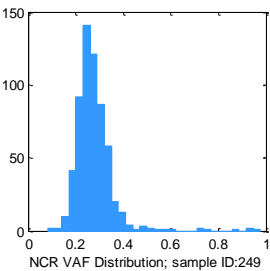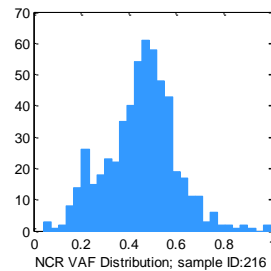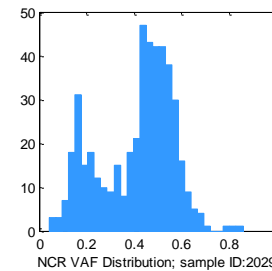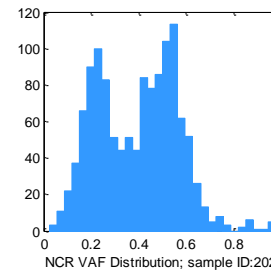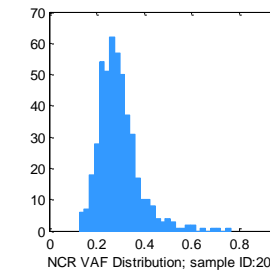

# Somatic VAF distribution for Fusion Negative RMS: before and after NCR (normal contamination correction)

Each row has two subrows: the upper one is before NCR the lower one is after NCR

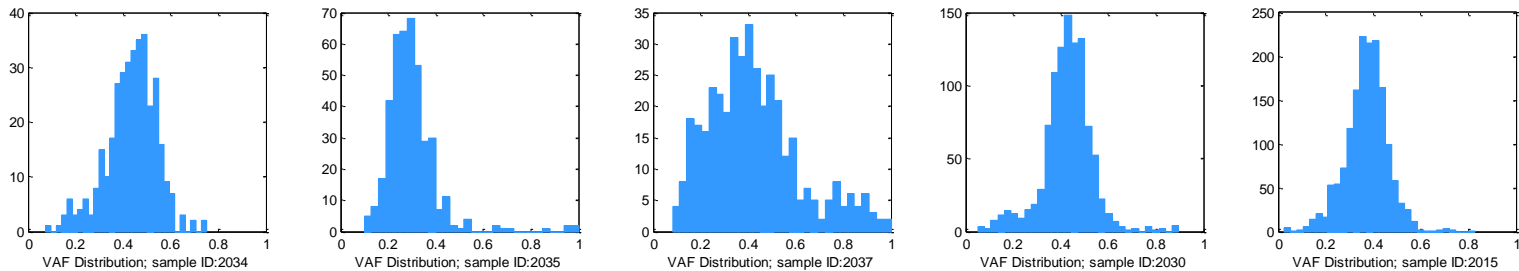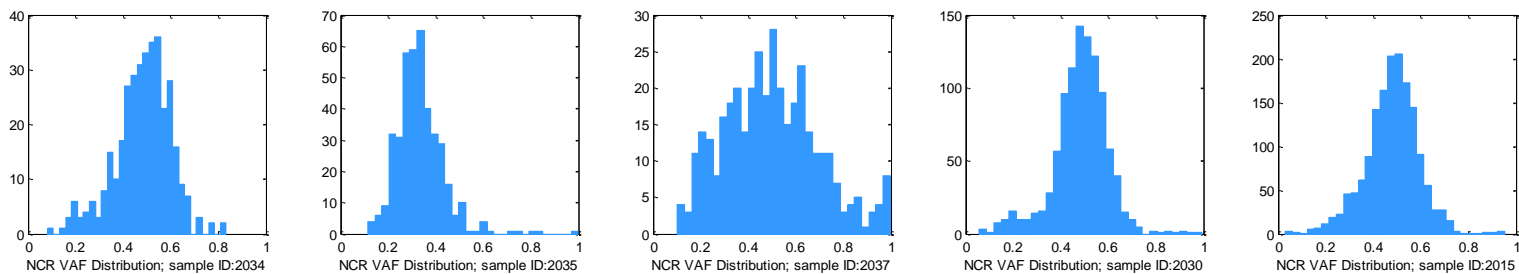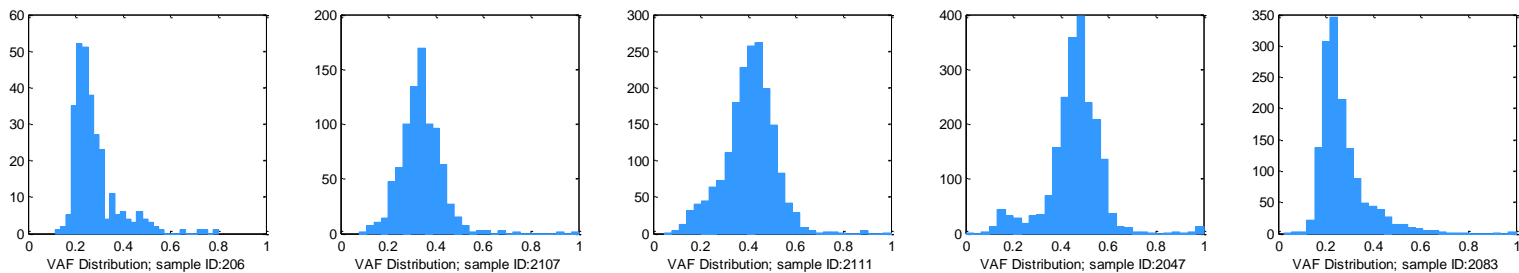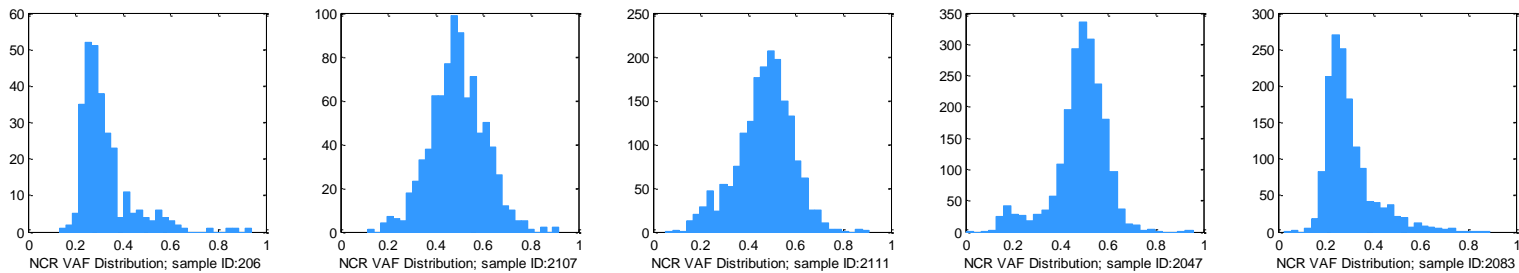

# Somatic VAF distribution for Fusion Positive RMS: before and after NCR (normal contamination correction)

Each row has two subrows: the upper one is before NCR the lower one is after NCR

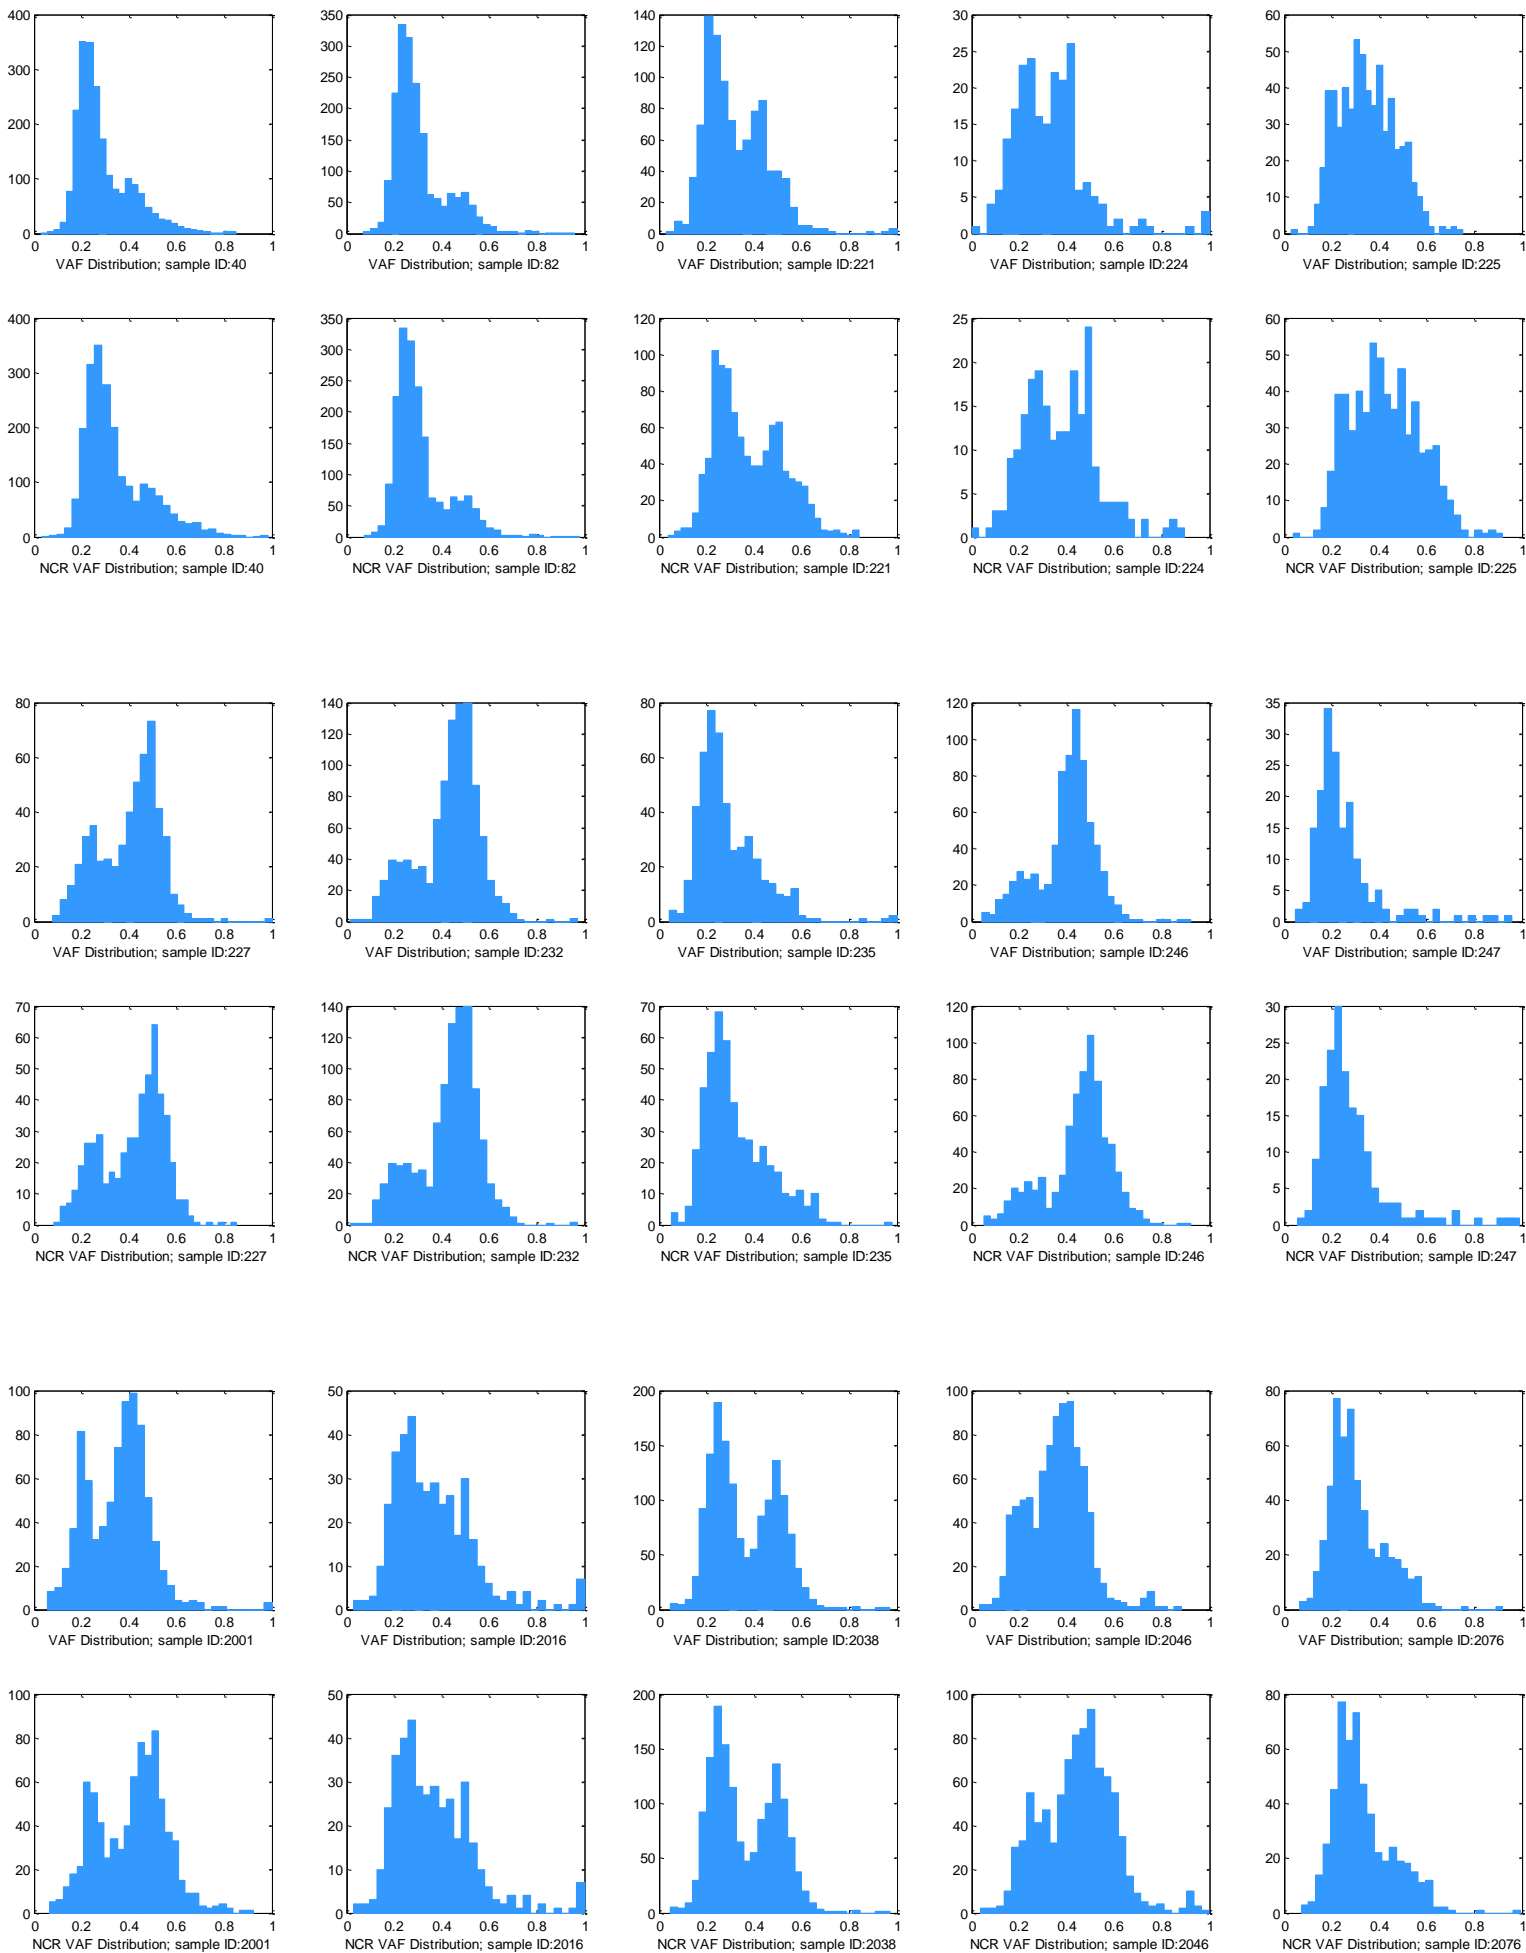

# Somatic VAF distribution for Fusion Positive RMS: before and after NCR (normal contamination correction)

Each row has two subrows: the upper one is before NCR the lower one is after NCR

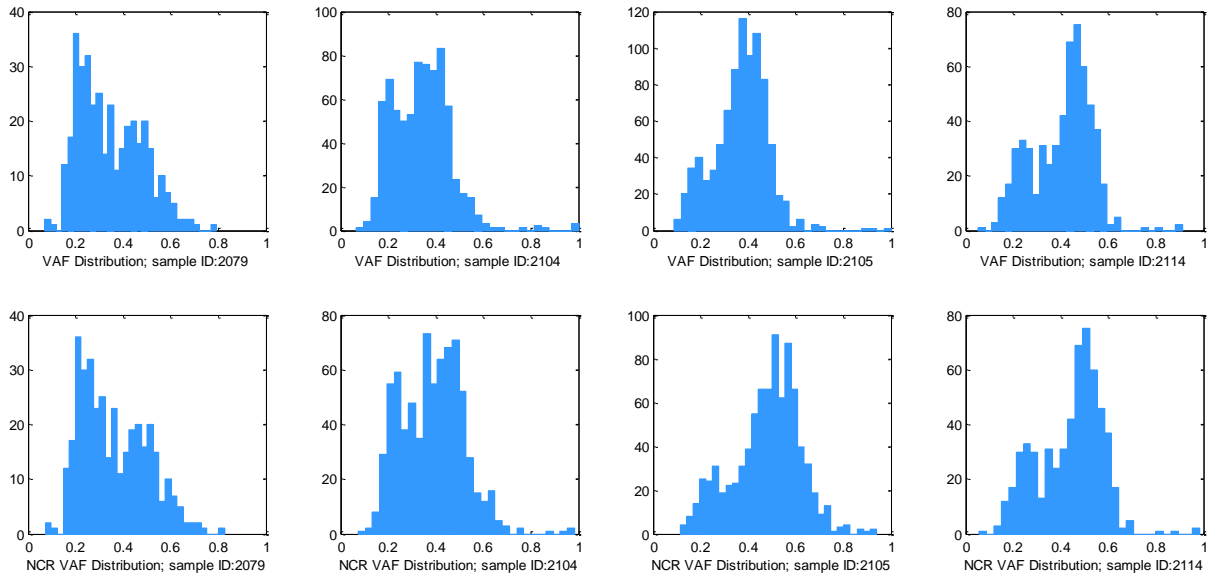

Supplement: pgen.1005075.s005.pdf [file pgen.1005075.s005.pdf]
