# Supplementary material for: Clonality and Evolutionary History of Rhabdomyosarcoma
Source: PubMed Central journal article supplement (PMC4358975; doi:10.1371/journal.pgen.1005075), 2015-03-13

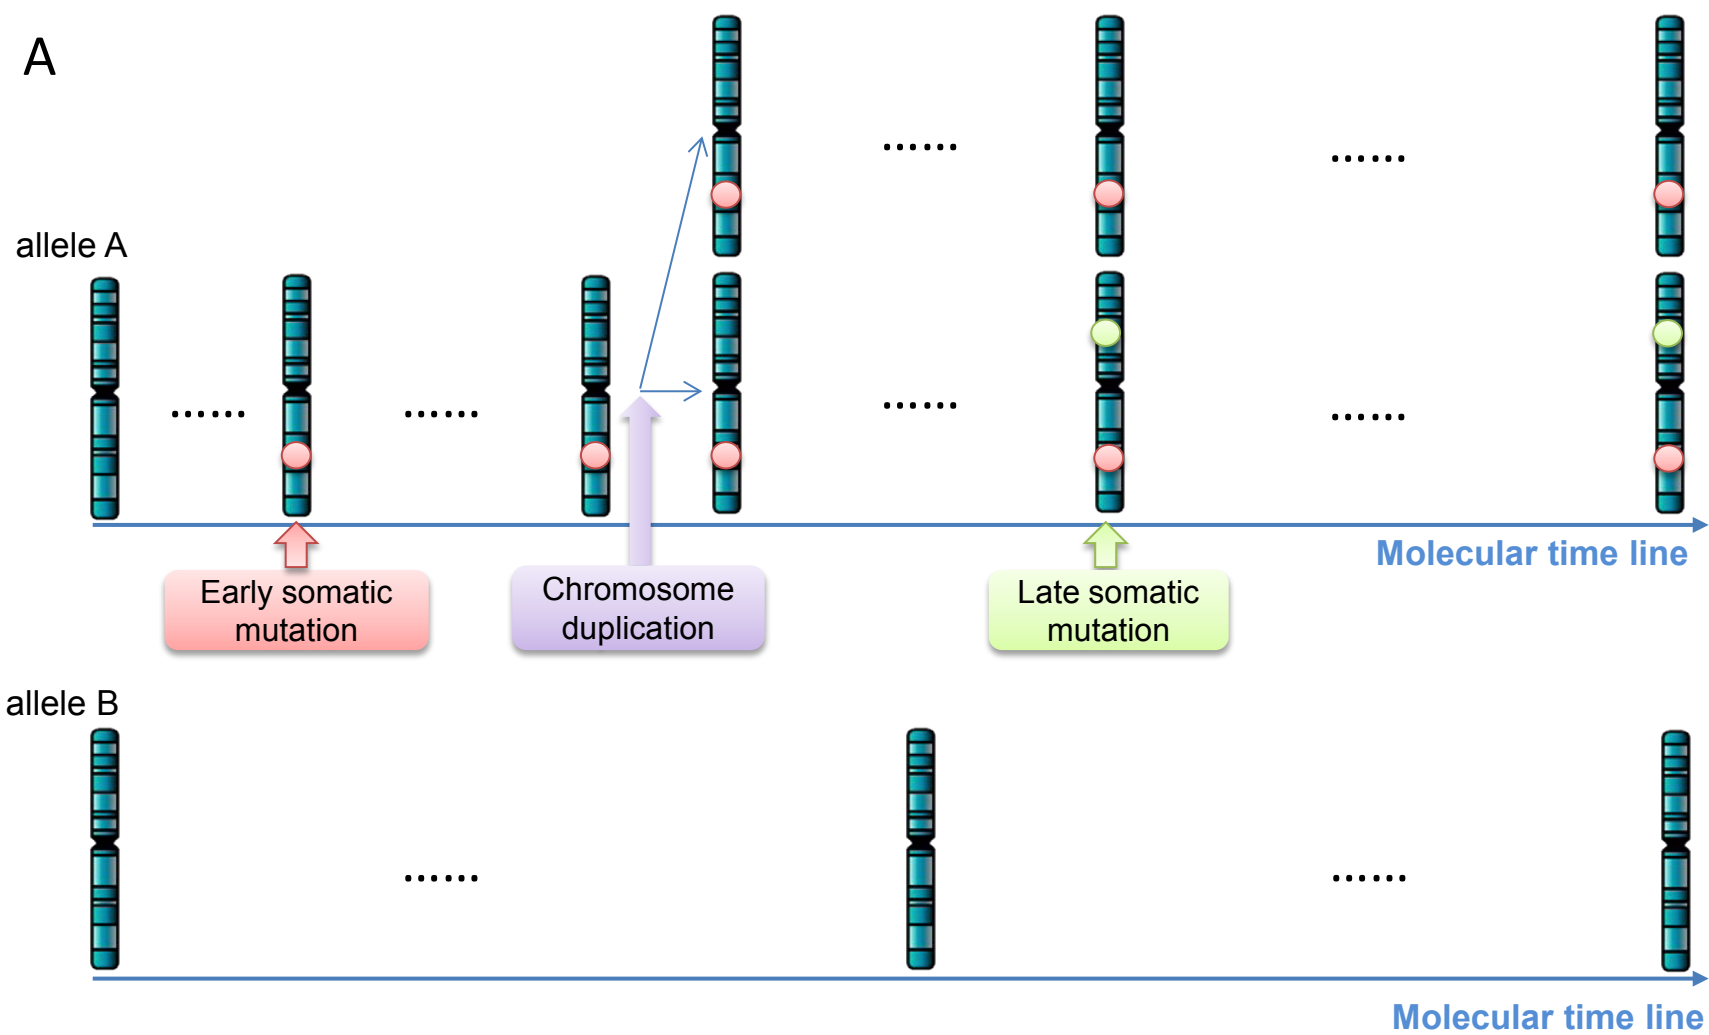

Early mutation on allele A :  $VAF=2/3$

Late mutation on allele A :  $VAF=1/3$

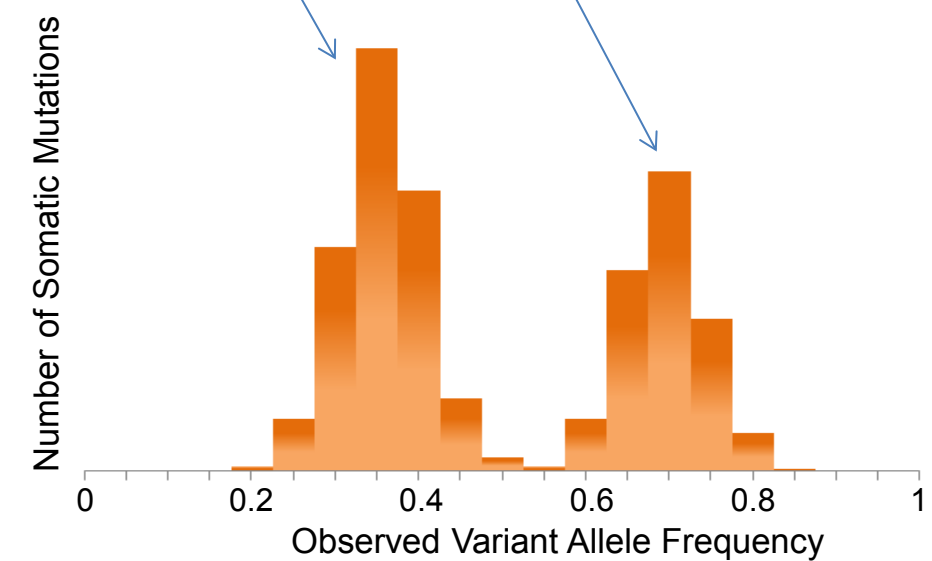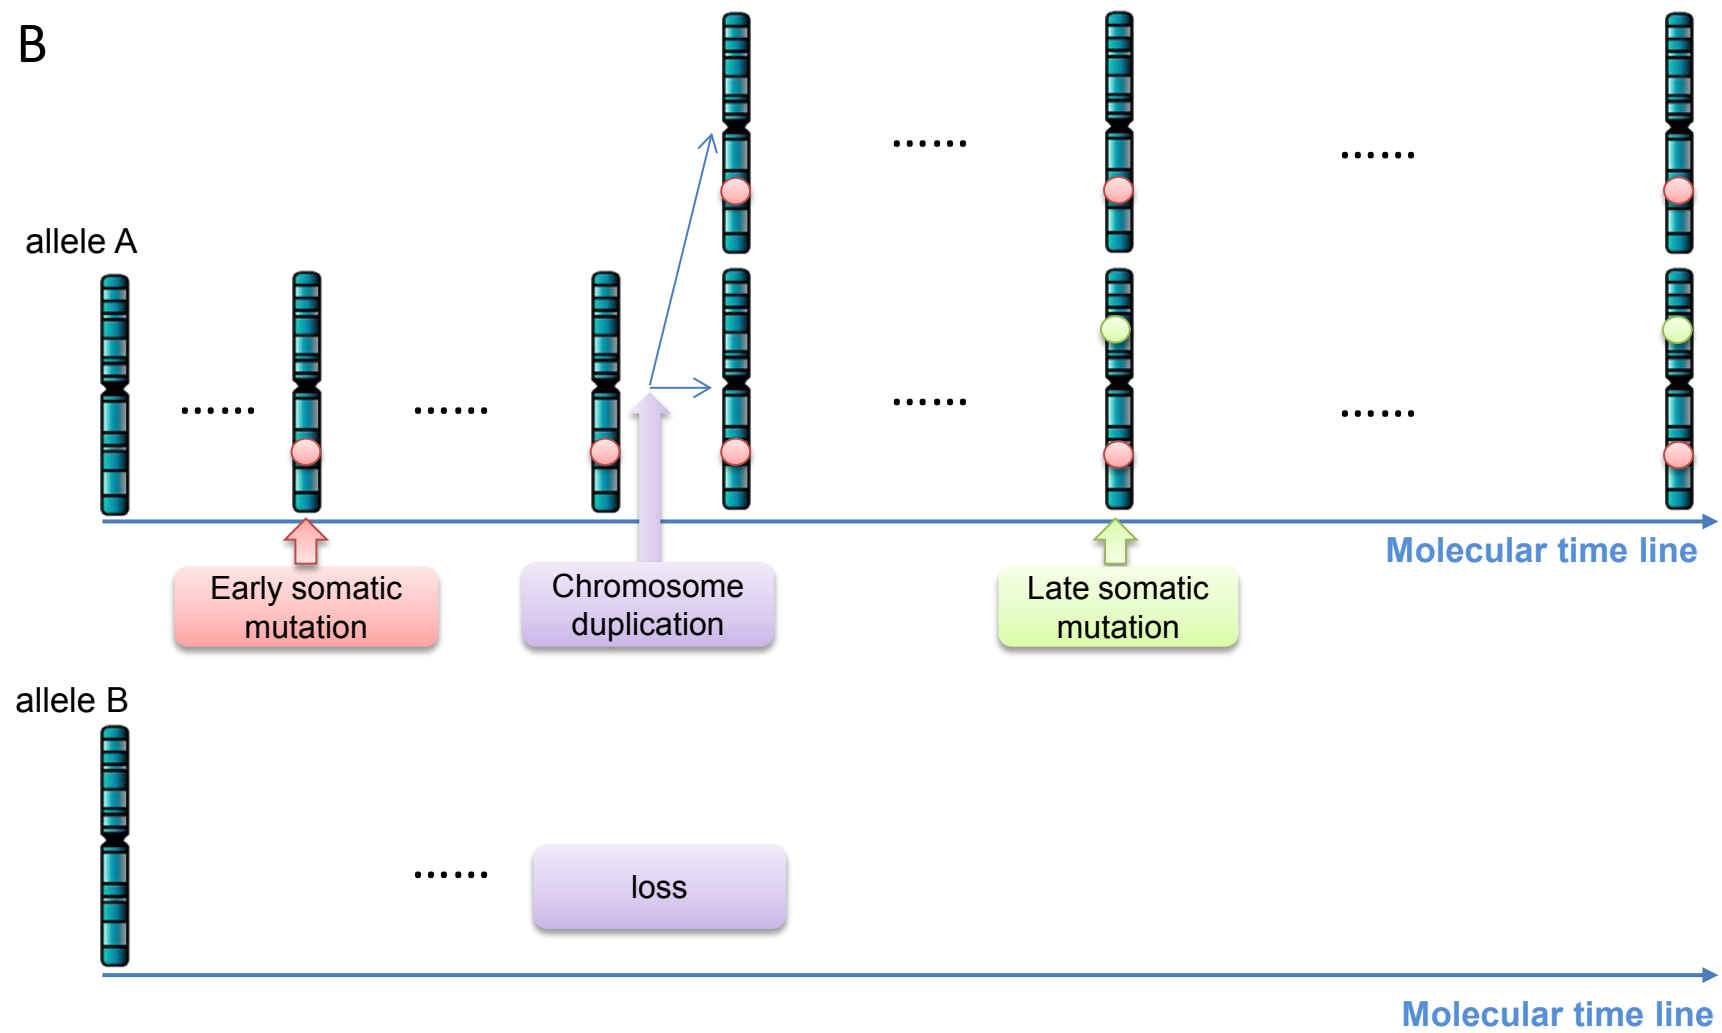

Early mutation on allele A :  $VAF=1$

Late mutation on allele A :  $VAF=1/2$

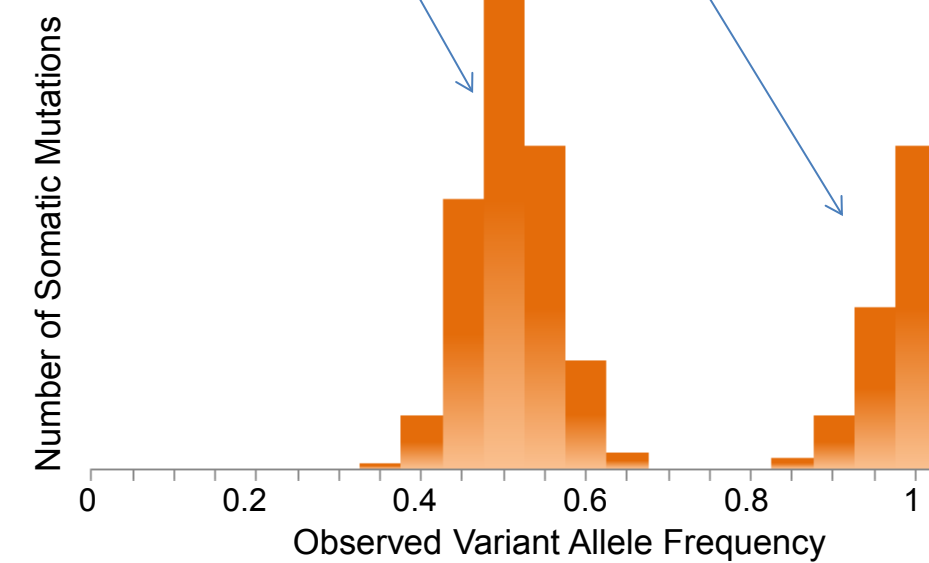

Supplement: pgen.1005075.s008.pdf [file pgen.1005075.s008.pdf]
