# Supplementary material for: Clonality and Evolutionary History of Rhabdomyosarcoma
Source: PubMed Central journal article supplement (PMC4358975; doi:10.1371/journal.pgen.1005075), 2015-03-13

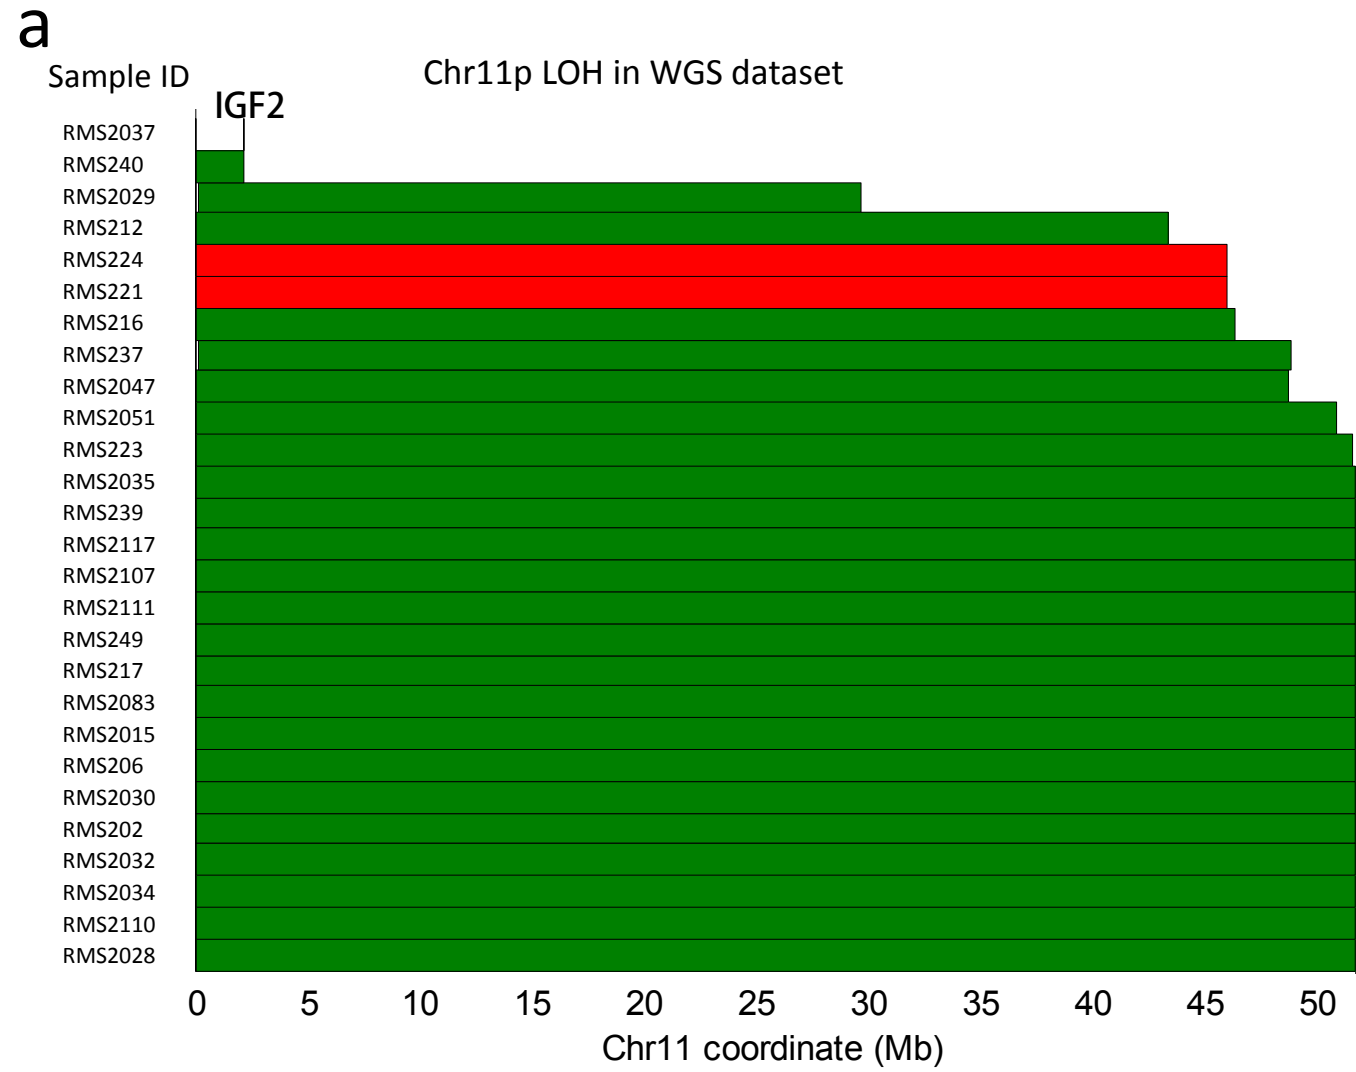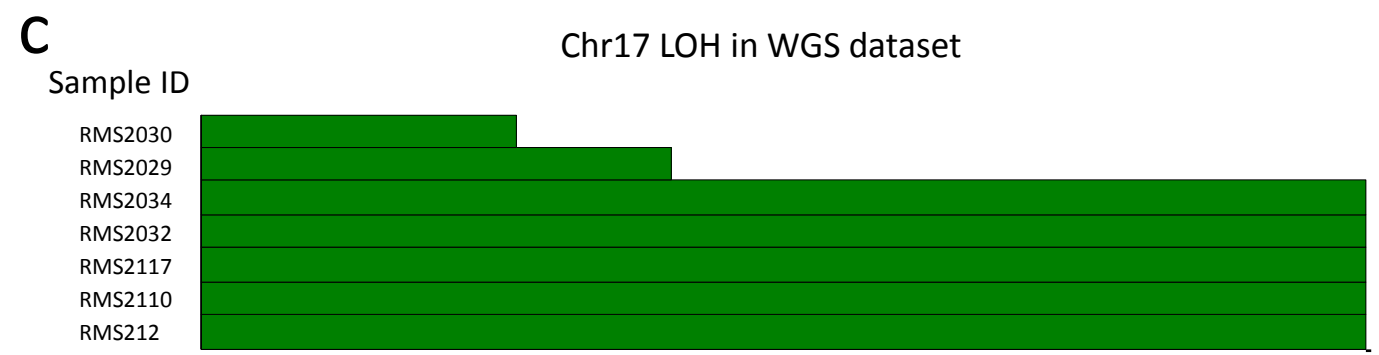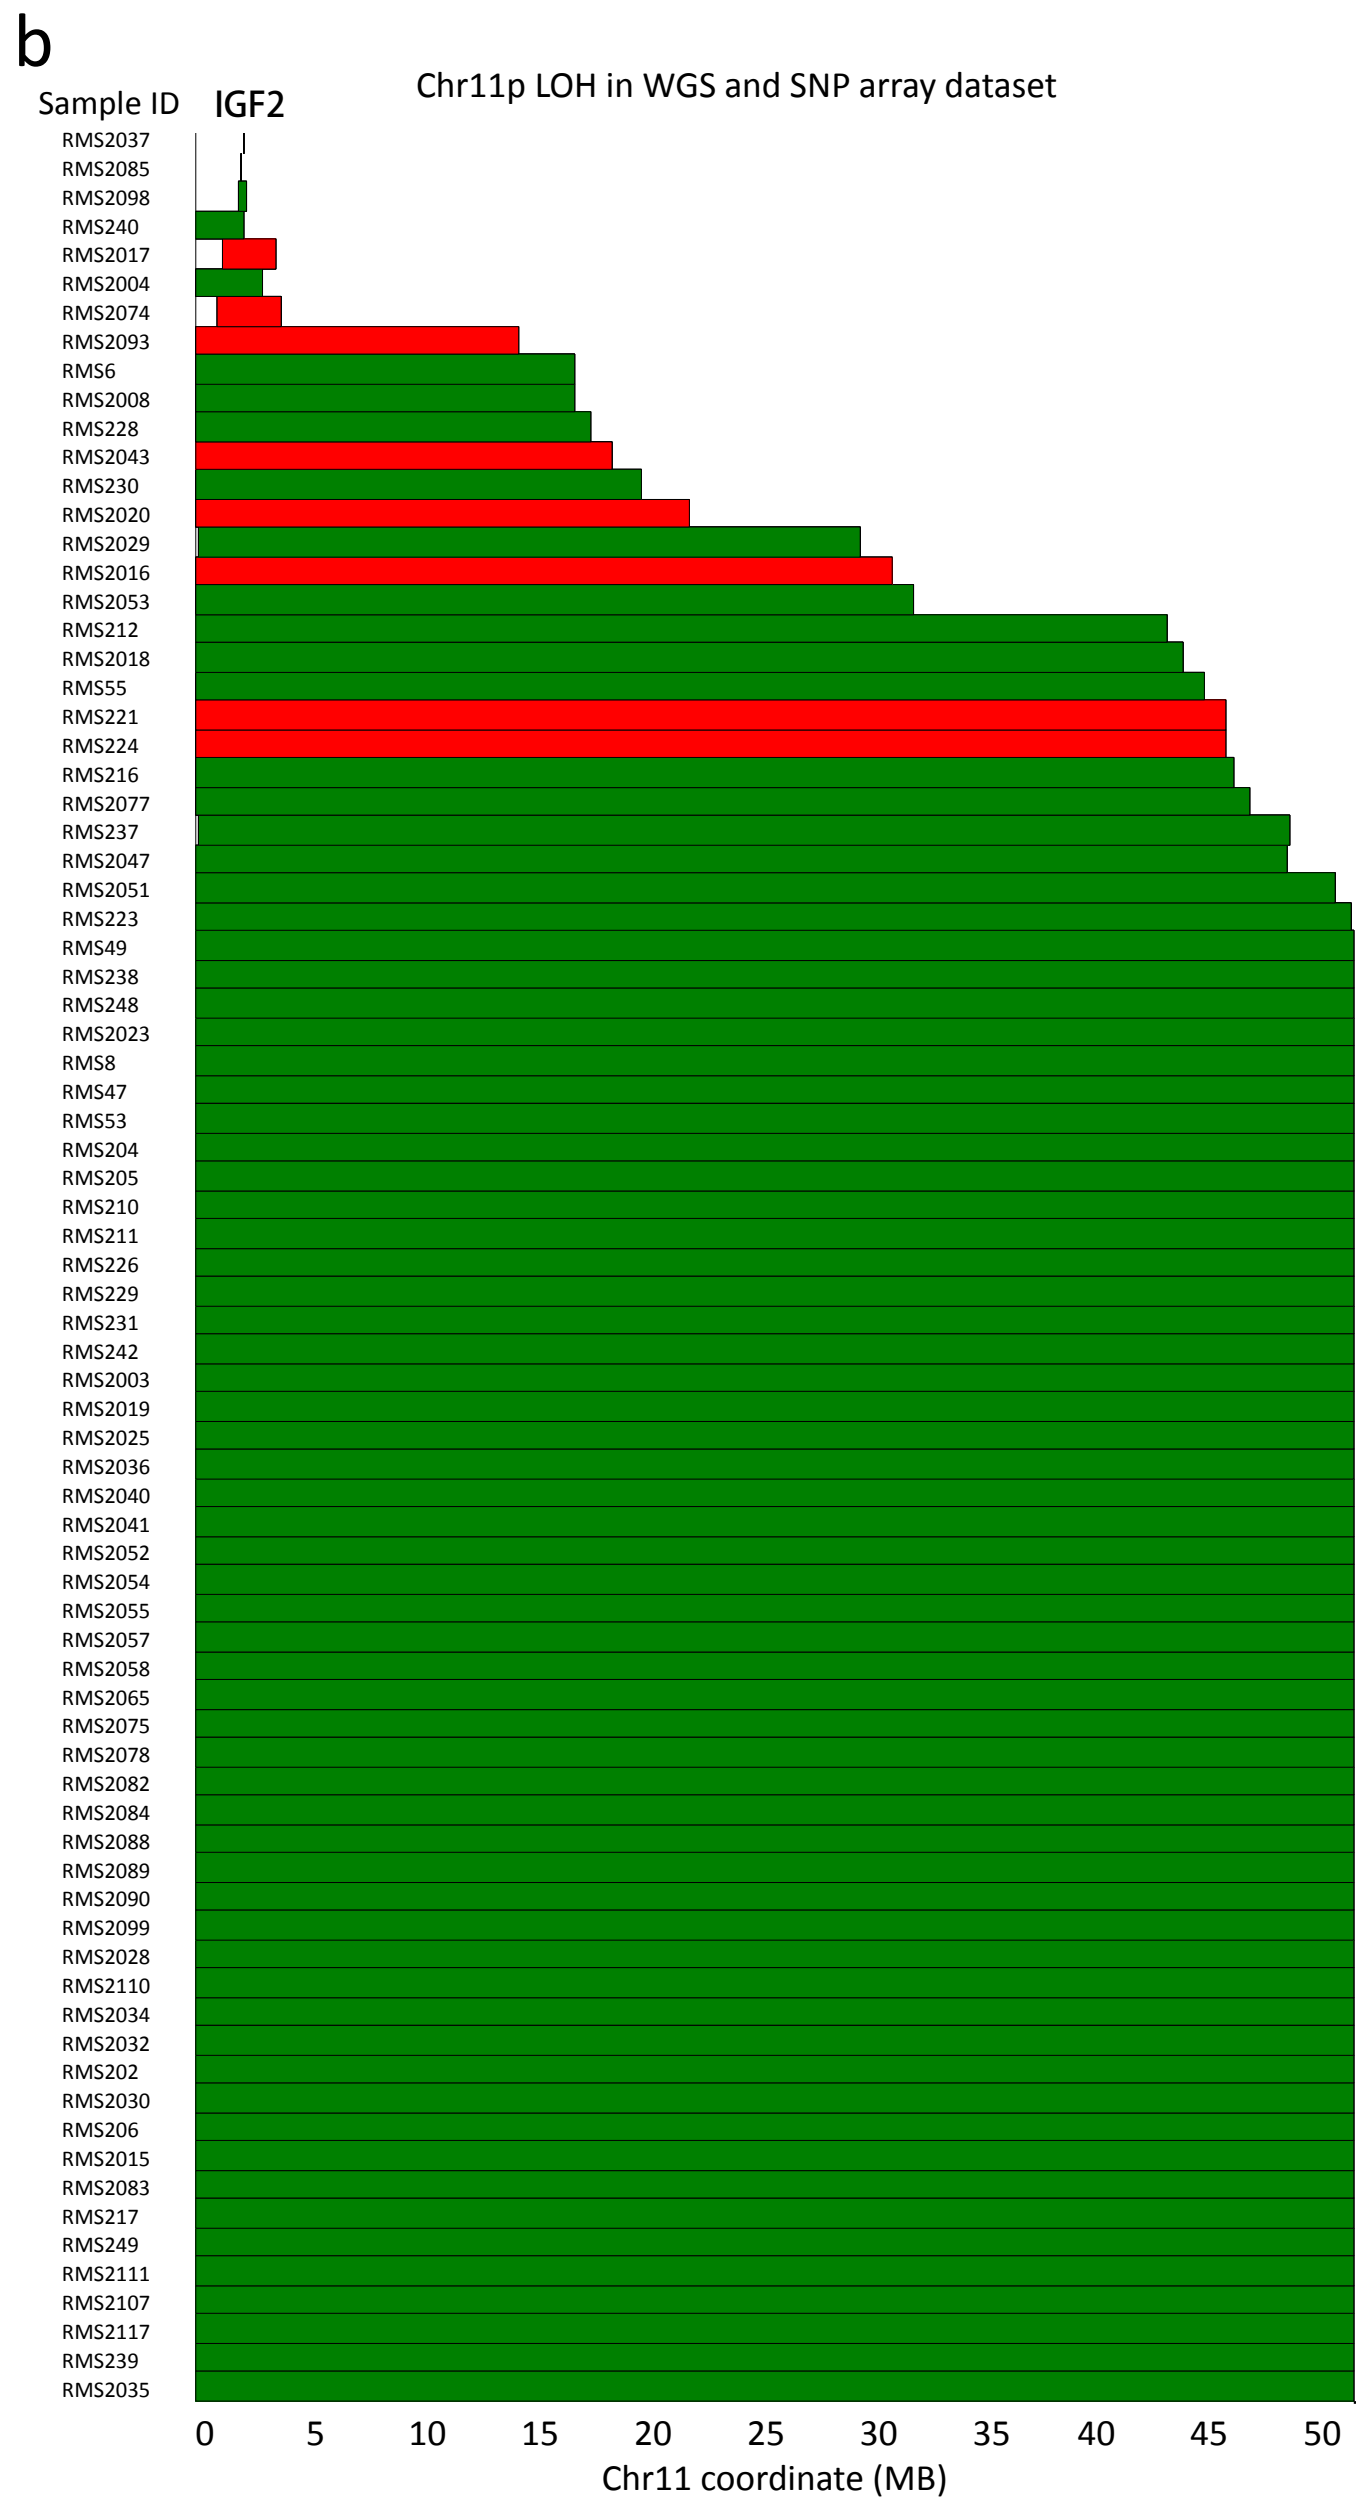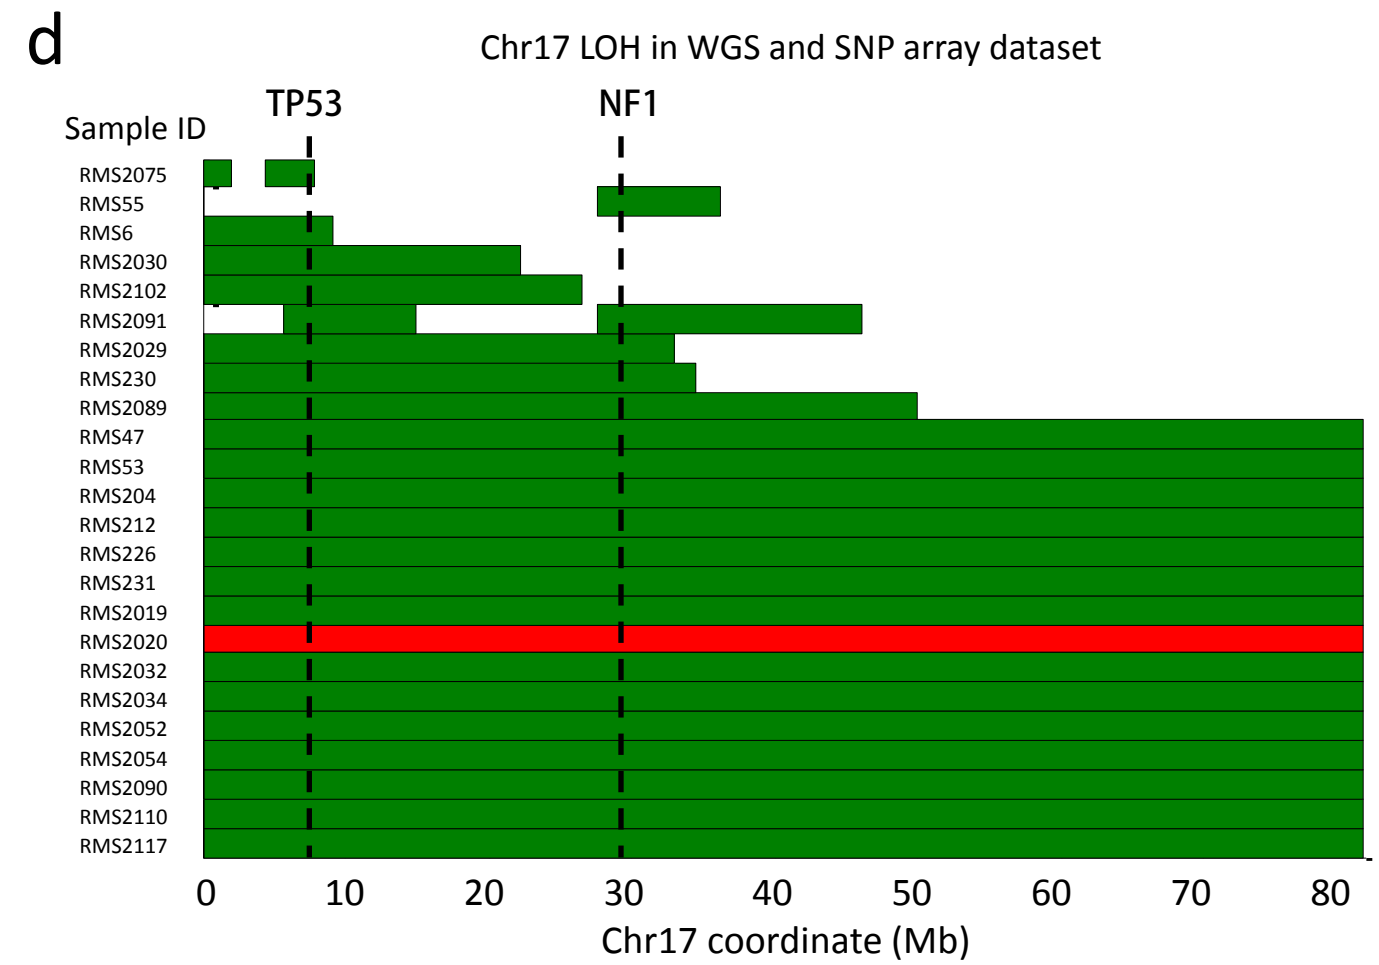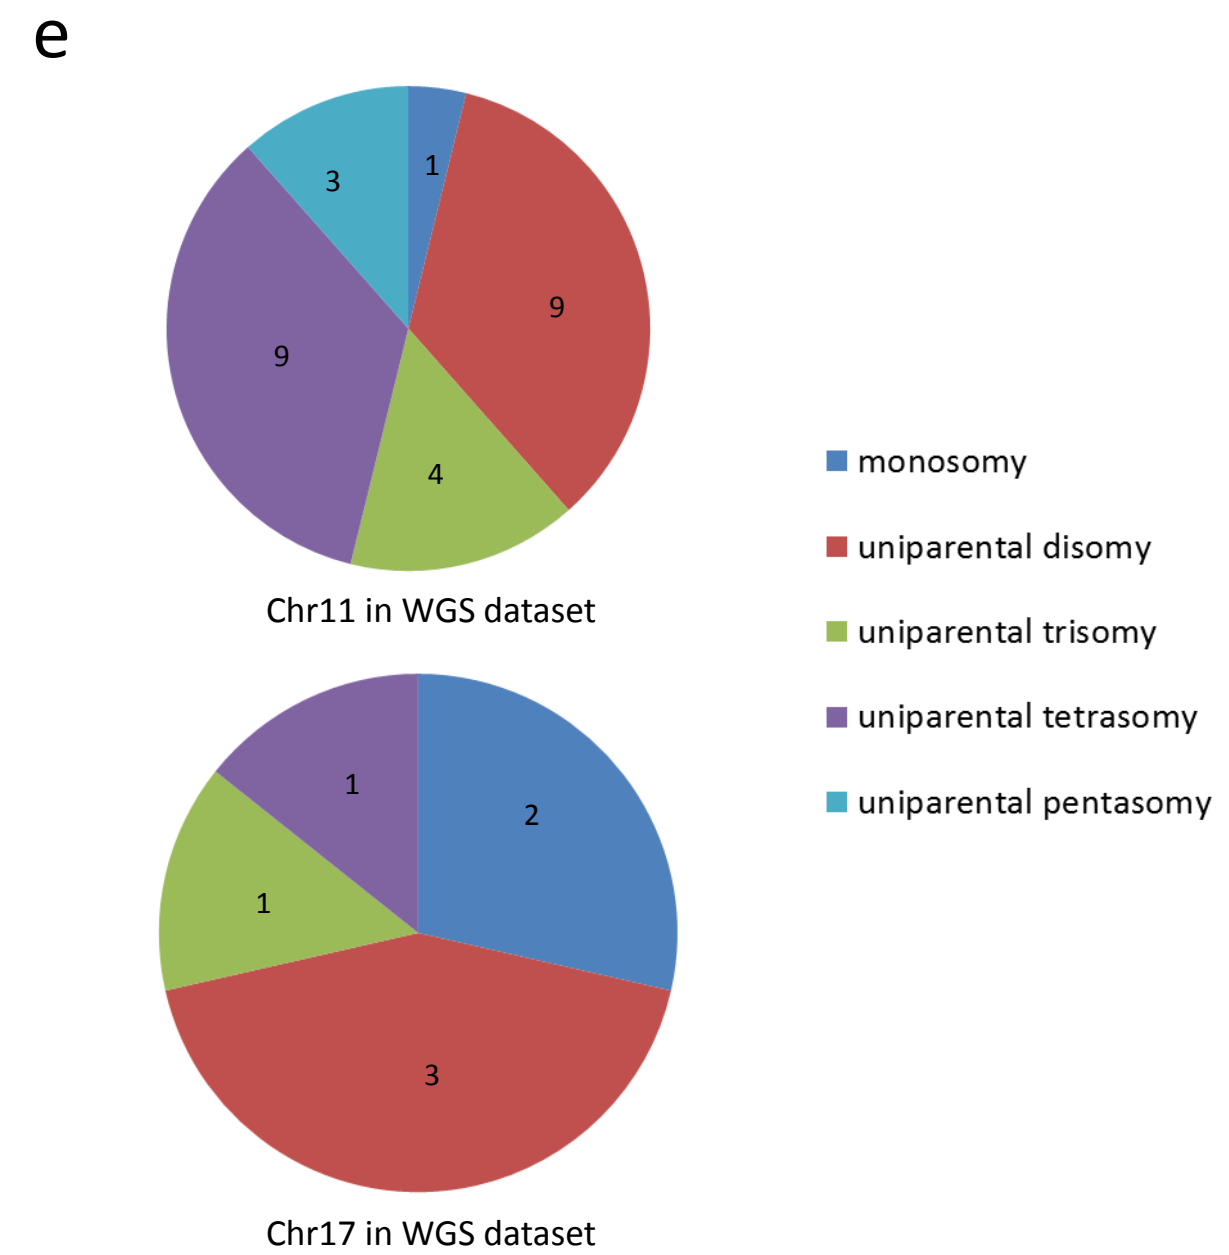

Supplement: pgen.1005075.s011.pdf [file pgen.1005075.s011.pdf]
