# Supplementary material for: Clonality and Evolutionary History of Rhabdomyosarcoma
Source: PubMed Central journal article supplement (PMC4358975; doi:10.1371/journal.pgen.1005075), 2015-03-13
Supplement: pgen.1005075.s012.pdf [file pgen.1005075.s012.pdf]

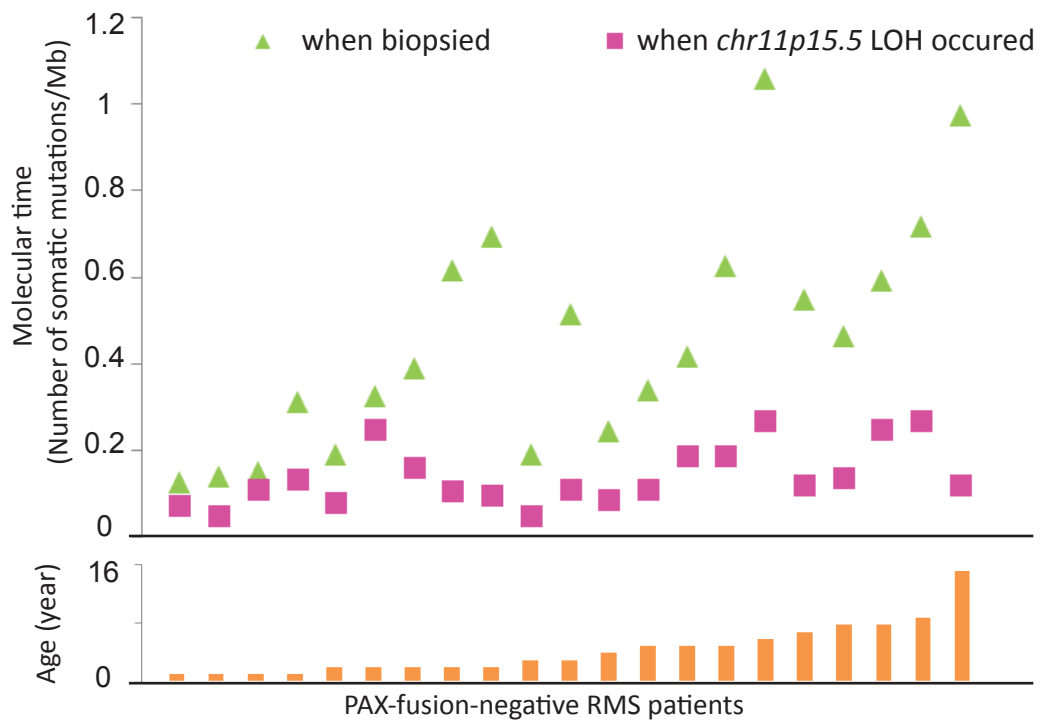

Supplementary Figure S11. Chen *et al.*
