# Supplementary material for: Clonality and Evolutionary History of Rhabdomyosarcoma
Source: PubMed Central journal article supplement (PMC4358975; doi:10.1371/journal.pgen.1005075), 2015-03-13
Supplement: pgen.1005075.s015.pdf [file pgen.1005075.s015.pdf]

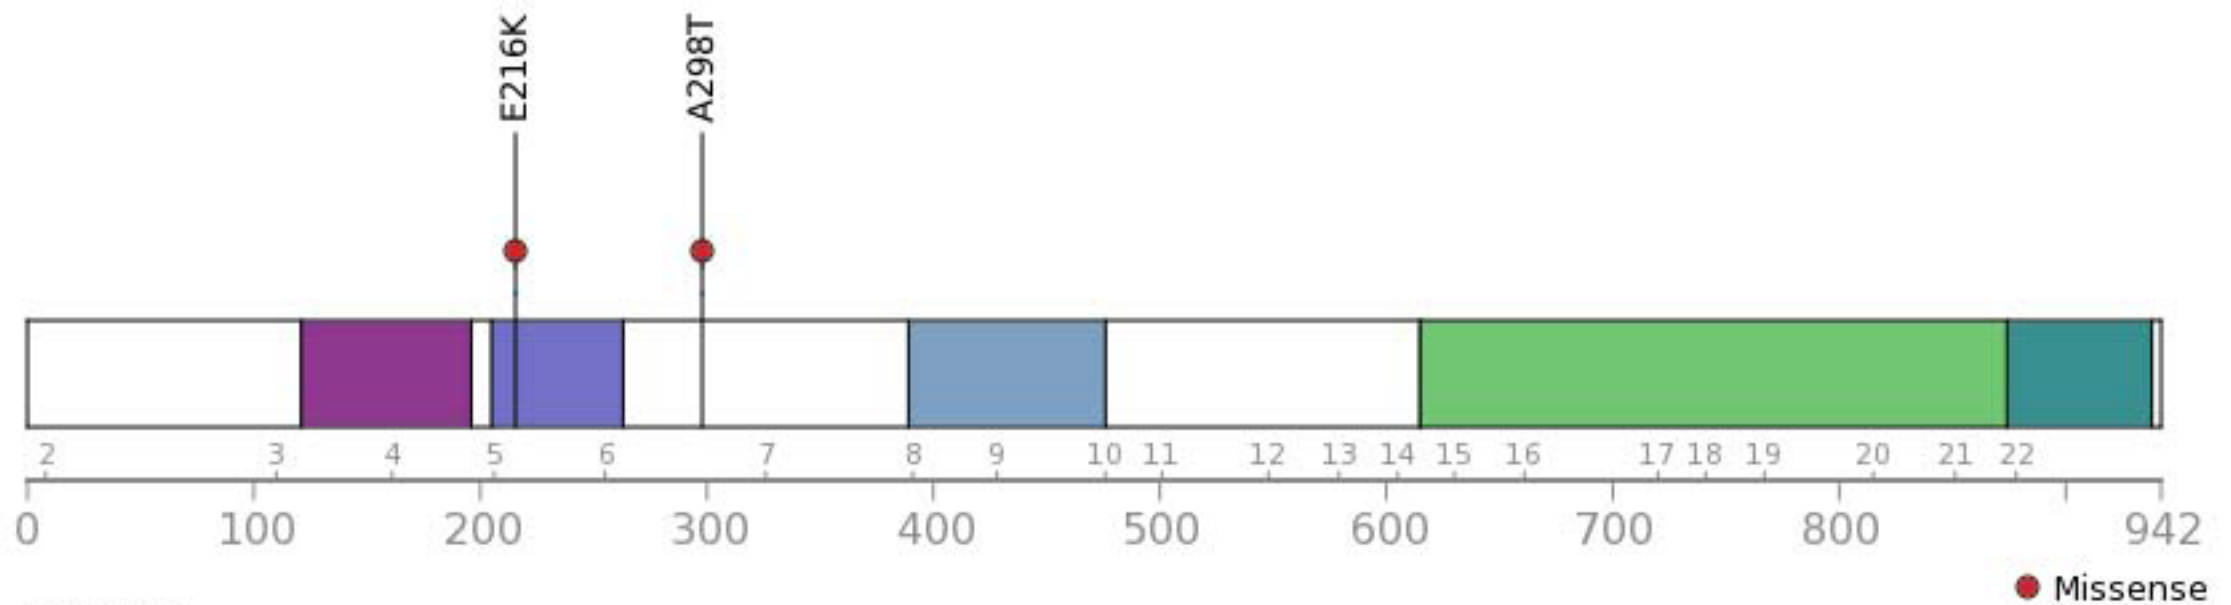

## PKN1

NM\_002741

- HR1\_PKN1\_2 - Second Protein kinase C-related kinase homology region 1 (HR1) Rho-bin...
- HR1\_PKN1\_3 - Third Protein kinase C-related kinase homology region 1 (HR1) Rho-bind...
- C2\_PKN-like - C2 domain in Protein kinase C-like (PKN) proteins....
- STKc\_PKN - Catalytic domain of the Protein Serine/Threonine Kinase, Protein Kinas...
- S\_TKc - Serine/Threonine protein kinases, catalytic domain...
